# Supplementary material for: Epidemiology of respiratory syncytial virus in a large pediatric hospital in Central Italy and development of a forecasting model to predict the seasonal peak
Source: Springer Nature journal article supplement (doi:10.1186/s13052-024-01624-x), 2024-04-08
Supplement: MOESM1 [file 26956122]

**Supplementary file 1.** ICD 9-CM diagnosis at ED discharge for ARI

| <b>ICD-9 CM code and description</b> |
|--------------------------------------|
| 460 ACUTE NASOPHARYNGITIS            |
| 461 AC SINUSITIS                     |
| 4610 AC MAXILLARY SINUSITIS          |
| 4611 AC FRONTAL SINUSITIS            |
| 4612 AC ETHMOIDAL SINUSITIS          |
| 4613 AC SPHENOIDAL SINUSITIS         |
| 4618 OTHER ACUTE SINUSITIS           |
| 4619 ACUTE SINUSITIS NOS             |
| 462 ACUTE PHARYNGITIS                |
| 463 ACUTE TONSILLITIS                |
| 4640 AC LARYNGITIS                   |
| 46400 AC LARYNGITIS W/O OBST         |
| 46401 AC LARYNGITIS W OBSTRUCT       |
| 46410 AC TRACHEITIS NO OBSTRUC       |
| 46411 AC TRACHEITIS W OBSTRUCT       |
| 4642 AC LARYNGOTRACH                 |
| 46420 AC LARYNGOTRACH NO OBSTR       |
| 46421 AC LARYNGOTRACH W OBSTR        |
| 4643 AC EPIGLOTTITIS                 |
| 46430 AC EPIGLOTTITIS NO OBSTR       |
| 46431 AC EPIGLOTTITIS W OBSTR        |
| 4644 CROUP                           |
| 4659 ACUTE URI NOS                   |
| 4660 ACUTE BRONCHITIS                |
| 46611 ACU BRONCHOLITIS D/T RSV       |
| 46619 ACU BRNCHLTS D/T OTH ORG       |
| 4800 ADENOVIRAL PNEUMONIA            |
| 4801 RESP SYNCYT VIRAL PNEUM         |
| 4802 PARINFLUENZA VIRAL PNEUM        |
| 4808 VIRAL PNEUMONIA NEC             |
| 4809 VIRAL PNEUMONIA NOS             |
| 481 PNEUMOCOCCAL PNEUMONIA           |
| 48283 PNEUMO OTH GRM-NEG BACT        |
| 48289 PNEUMONIA OTH SPCF BACT        |
| 4829 BACTERIAL PNEUMONIA NOS         |
| 4830 PNEU MYCPLSM PNEUMONIAE         |
| 4838 PNEUMON OTH SPEC ORGNSM         |
| 485 BRONCHOPNEUMONIA ORG NOS         |
| 486 PNEUMONIA, ORGANISM NOS          |
| 4870 INFLUENZA WITH PNEUMONIA        |
| 4871 FLU W RESP MANIFEST NEC         |
| 4878 FLU W MANIFESTATION NEC         |
| 7806 FEVER                           |

|                              |
|------------------------------|
| 78606 TACHYPNEA              |
| 78609 RESPIRATORY ABNORM NEC |
| 7862 COUGH                   |
| 78650 CHEST PAIN NOS         |
| 78651 PRECORDIAL PAIN        |
| 78652 PAINFUL RESPIRATION    |
| 78659 CHEST PAIN NEC         |
| 7931 ABN FINDINGS-LUNG FIELD |
