# Supplementary material for: Epidemiology of respiratory syncytial virus in a large pediatric hospital in Central Italy and development of a forecasting model to predict the seasonal peak
Source: Springer Nature journal article supplement (doi:10.1186/s13052-024-01624-x), 2024-04-08
Supplement: MOESM2 [file 26956122]

**Supplementary file 2. Trend of laboratory-confirmed RSV infections by season and age-classes; OPBG, January 2018 – December 2022**

|                    | Season<br>2017-2018        | Season<br>2018-2019        | Season<br>2019-2020        | Season<br>2020-2021      | Season<br>2021-2022        | Season<br>2022-2023        | Total                         | <i>P-value</i> |
|--------------------|----------------------------|----------------------------|----------------------------|--------------------------|----------------------------|----------------------------|-------------------------------|----------------|
| <b>Age classes</b> |                            |                            |                            |                          |                            |                            |                               |                |
| <b>&lt;1</b>       | 322<br>(67.9)              | 524<br>(66.6)              | 451<br>(65.6)              | 2<br>(40.0)              | 529<br>(55.3)              | 288<br>(61.8)              | <b>2,116</b><br><b>(62.6)</b> | <0.001         |
| <b>1-4</b>         | 99<br>(20.9)               | 196<br>(24.9)              | 188<br>(27.3)              | 2<br>(40.0)              | 323<br>(33.7)              | 126<br>(26.8)              | <b>934</b><br><b>(27.6)</b>   | <0.001         |
| <b>5-9</b>         | 30<br>(6.3)                | 40<br>(5.1)                | 25<br>(3.6)                | 1<br>(20.0)              | 65<br>(6.8)                | 34<br>(7.3)                | <b>195</b><br><b>(5.8)</b>    | 0.04           |
| <b>≥10</b>         | 23<br>(4.8)                | 27<br>(3.4)                | 24<br>(3.5)                | 0<br>(0.0)               | 40<br>(4.2)                | 19<br>(4.1)                | <b>133</b><br><b>(3.9)</b>    | 0.7            |
| <b>Total</b>       | <b>474</b><br><b>(100)</b> | <b>787</b><br><b>(100)</b> | <b>688</b><br><b>(100)</b> | <b>5</b><br><b>(100)</b> | <b>957</b><br><b>(100)</b> | <b>466</b><br><b>(100)</b> | <b>3,378</b><br><b>(100)</b>  |                |

*Seasons 2017-2018 consider the first 12 weeks of the year 2018 and the last 12 of the year 2022; the other seasons were completed and lasted from from week 39 of the previous year and ending at week 12 of the next year*
