# Supplementary material for: Epidemiology of respiratory syncytial virus in a large pediatric hospital in Central Italy and development of a forecasting model to predict the seasonal peak
Source: Springer Nature journal article supplement (doi:10.1186/s13052-024-01624-x), 2024-04-08
Supplement: MOESM3 [file 26956122]

**Supplementary file 3. Trend of RSV-related hospitalizations by season and age-classes; OPBG, January 2018 – December 2022**

|                    | Season<br>2017-2018        | Season<br>2018-2019        | Season<br>2019-2020        | Season<br>2020-2021      | Season<br>2021-2022        | Season<br>2022-2023        | Total                         | <i>P-value</i> |
|--------------------|----------------------------|----------------------------|----------------------------|--------------------------|----------------------------|----------------------------|-------------------------------|----------------|
| <b>Age classes</b> |                            |                            |                            |                          |                            |                            |                               |                |
| <b>&lt;1</b>       | 234<br>(88.6)              | 394<br>(85.3)              | 361<br>(86.6)              | 2<br>(100.0)             | 286<br>(81.7)              | 251<br>(72.7)              | <b>1,528</b><br><b>(83.0)</b> | <0.001         |
| <b>1-4</b>         | 24<br>(9.1)                | 56<br>(12.1)               | 52<br>(12.5)               | 0<br>(0.0)               | 51<br>(14.6)               | 76<br>(22.0)               | <b>259</b><br><b>(14.1)</b>   | <0.001         |
| <b>5-9</b>         | 5<br>(1.9)                 | 10<br>(2.2)                | 3<br>(0.7)                 | 0<br>(0.0)               | 9<br>(2.6)                 | 11<br>(3.2)                | <b>38</b><br><b>(2.1)</b>     | 0.3            |
| <b>≥10</b>         | 1<br>(0.4)                 | 2<br>(0.4)                 | 1<br>(0.2)                 | 0<br>(0.0)               | 4<br>(1.1)                 | 7<br>(2.0)                 | <b>15</b><br><b>(0.8)</b>     | 0.02           |
| <b>Total</b>       | <b>264</b><br><b>(100)</b> | <b>462</b><br><b>(100)</b> | <b>417</b><br><b>(100)</b> | <b>2</b><br><b>(100)</b> | <b>350</b><br><b>(100)</b> | <b>345</b><br><b>(100)</b> | <b>1,840</b><br><b>(100)</b>  |                |

*Seasons 2017-2018 consider the first 12 weeks of the year 2018 and the last 12 of the year 2022; the other seasons were completed and lasted from from week 39 of the previous year and ending at week 12 of the next year*
