# Supplementary material for: Epidemiology of respiratory syncytial virus in a large pediatric hospital in Central Italy and development of a forecasting model to predict the seasonal peak
Source: Springer Nature journal article supplement (doi:10.1186/s13052-024-01624-x), 2024-04-08
Supplement: MOESM4 [file 26956122]

**Supplementary file 4. Trend of ICU admissions by season and age-classes; OPBG, January 2018 – December 2022**

|                    | Season<br>2017-2018       | Season<br>2018-2019       | Season<br>2019-2020       | Season<br>2020-2021      | Season<br>2021-2022       | Season<br>2022-2023       | Total                       | <i>P-value</i> |
|--------------------|---------------------------|---------------------------|---------------------------|--------------------------|---------------------------|---------------------------|-----------------------------|----------------|
| <b>Age classes</b> |                           |                           |                           |                          |                           |                           |                             |                |
| <b>&lt;1</b>       | 34<br>(94.4)              | 52<br>(96.3)              | 38<br>(95.0)              | 1<br>(100)               | 38<br>(90.5)              | 46<br>(84.1)              | <b>209</b><br><b>(91.3)</b> | <0.001         |
| <b>1-4</b>         | 2<br>(5.6)                | 2<br>(3.7)                | 2<br>(5.0)                | 0<br>(0.0)               | 3<br>(7.1)                | 9<br>(16.1)               | <b>18</b><br><b>(7.9)</b>   | 0.02           |
| <b>5-9</b>         | 0<br>(0.0)                | 0<br>(0.0)                | 0<br>(0.0)                | 0<br>(0.0)               | 1<br>(2.3)                | 1<br>(1.8)                | <b>2</b><br><b>(0.9)</b>    | -              |
| <b>≥10</b>         | 0<br>(0.0)                | 0<br>(0.0)                | 0<br>(0.0)                | 0<br>(0.0)               | 0<br>(0.0)                | 0<br>(0.0)                | <b>0</b><br><b>(0.0)</b>    | -              |
| <b>Total</b>       | <b>36</b><br><b>(100)</b> | <b>54</b><br><b>(100)</b> | <b>40</b><br><b>(100)</b> | <b>1</b><br><b>(100)</b> | <b>42</b><br><b>(100)</b> | <b>56</b><br><b>(100)</b> | <b>229</b><br><b>(100)</b>  |                |

*Seasons 2017-2018 consider the first 12 weeks of the year 2018 and the last 12 of the year 2022; the other seasons were completed and lasted from from week 39 of the previous year and ending at week 12 of the next year*
